# Supplementary material
Source: Research Square preprint supplement (doi:10.21203/rs.3.rs-10028692/v1)
Supplement: Supplementary file 1 [file 18b20d729203da8e5c51a793.docx]

**Apendix 1**

**Measurement model assessment and structural model indicators by subsample**

|  | Polluting firms | | | | | | Polluting firms | | | | | |
| --- | --- | --- | --- | --- | --- | --- | --- | --- | --- | --- | --- | --- |
| **CONSTRUCTS** | loadings | Cronbach alfa | Rho_A | Rho_C | AVE | VIF | loadings | Cronbach alfa | Rho_A | Rho_C | AVE | VIF |
| **OS** | 0.900 | 0,659 | 0.659 | 0,852 | 0,740 | 1.318 | 0,896 | 0,722 | 0.723 | 0,878 | 0.782 | 1.468 |
| 0.821 | 1.318 | 0,843 | 1.468 |
| **EF** | 0.811 | 0.719 | 0.732 | 0.841 | 0.639 | 1.405 | 0,820 | 0.714 | 0.735 | 0.840 | 0.638 | 1.558 |
| 0.839 | 1.499 | 0,848 | 1.582 |
| 0.746 | 1.359 | 0,723 | 1.248 |
| **SMM** | 0.847 | 0,708 | 0.740 | 0,835 | 0,630 | 1.445 | 0,855 | 0,774 | 0.796 | 0,868 | 0.687 | 1.643 |
| 0.827 | 1.565 | 0,835 | 1.676 |
| 0.697 | 1.276 | 0,722 | 1.492 |
| **ED** | 0.826 | 0.824 | 0.828 | 0.895 | 0.742 | 1.690 | 0,829 | 0.767 | 0.779 | 0.864 | 0.680 | 1.485 |
| 0.882 | 2.119 | 0,856 | 1.610 |
| 0.872 | 1.929 | 0,861 | 1.613 |

Note: ED=ecodesign; EF=ecoeffiency; SMM= Sustainable Materials Management; OS= Sustainabilty orientation
